# Supplementary material for: Breaking the Mold: Towards Rapid and Cost-Effective Microbial Contamination Detection in Paints and Cosmetics Using ATP-Bioluminescence
Source: MDPI journal article supplement (doi:10.3390/applmicrobiol4020040), 2024-03-22
Supplement: s1 [file s1]

# Supplementary Materials:

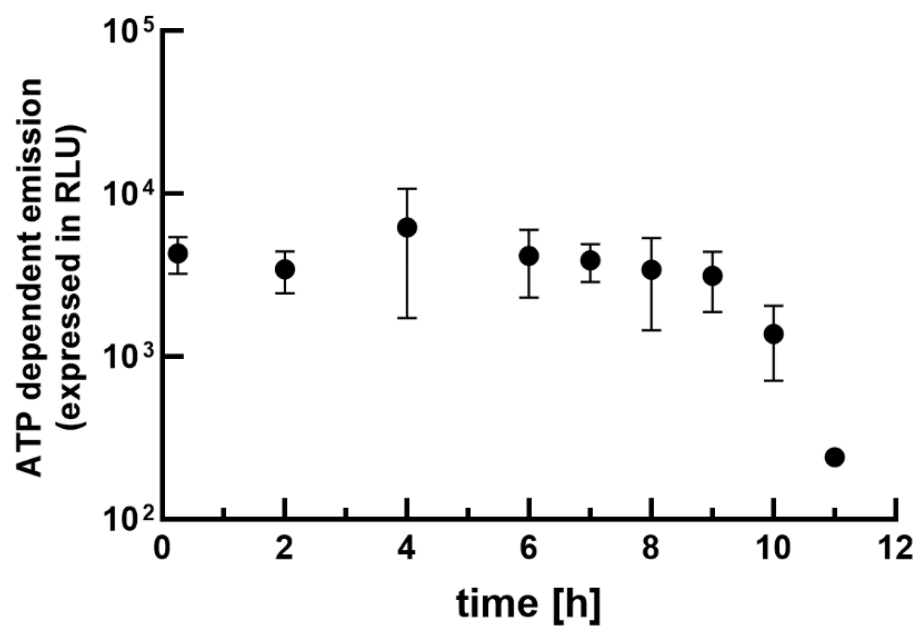

Supplementary Figure S1. “Burn-off” process over time. Results are given as mean ( $\pm$  SD),  $n=3$ .

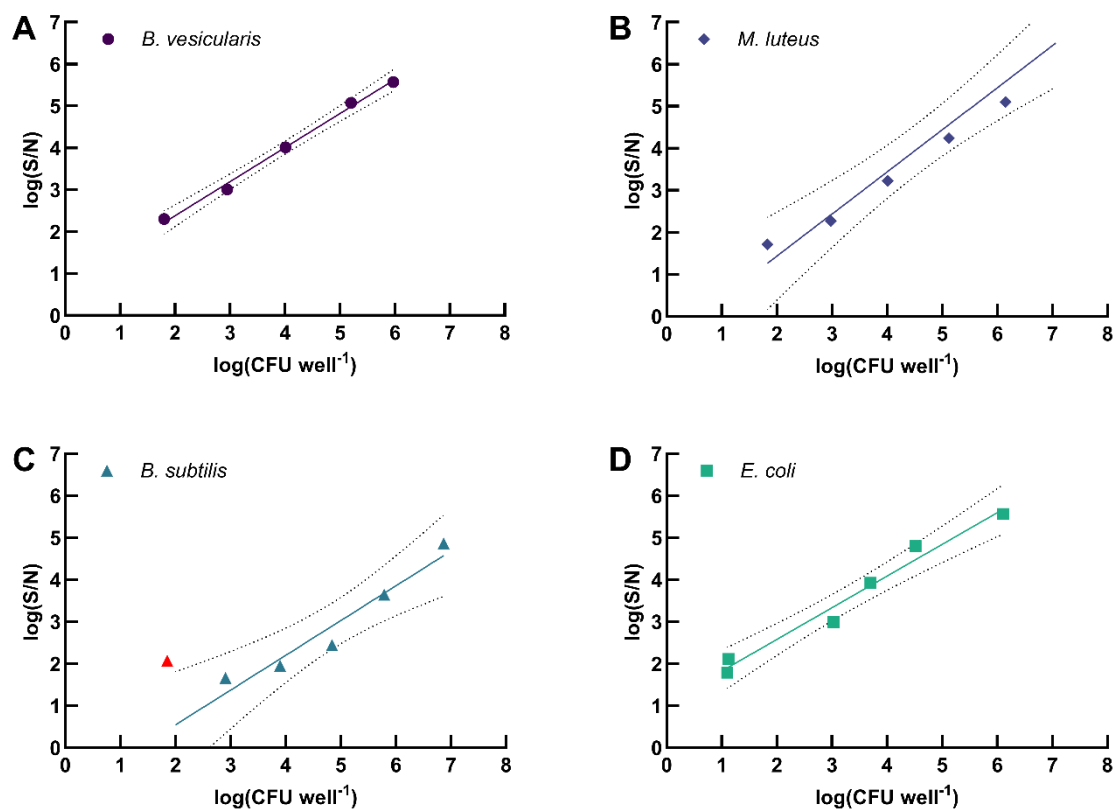

Supplementary Figure S2. Standard curves for each individual target organism including *Brevundimonas vesicularis* (A), *Micrococcus luteus* (B), *Bacillus subtilis* (C) and *Escherichia coli* (D). Results are given as log-transformed mean

values ( $n = 3$ ). Solid lines correspond to the linear regression, dashed lines represent the 95% confidence band. The red triangle was treated as outlier and excluded from the calculation.

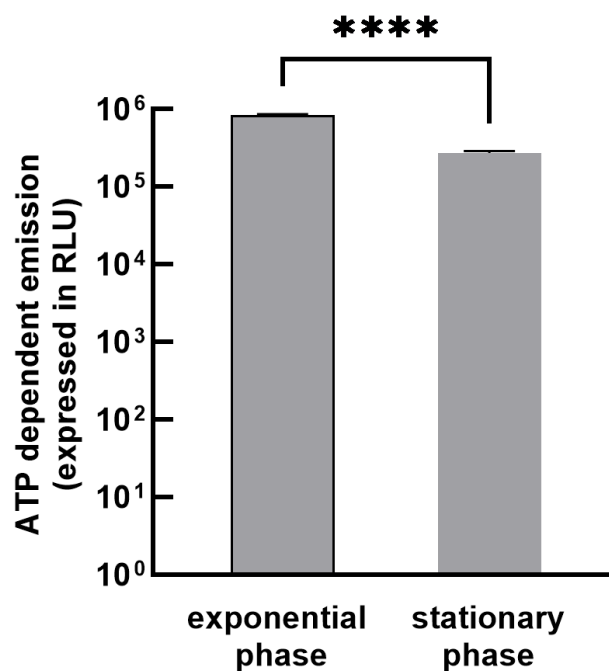

**Supplementary Figure S3.** Luminescence (expressed as RLU) depending on the respective growth-phase. Results represent means ( $\pm$  SD),  $n = 3$ . Asterisks indicate  $p$ -values  $< 0.0001$ .

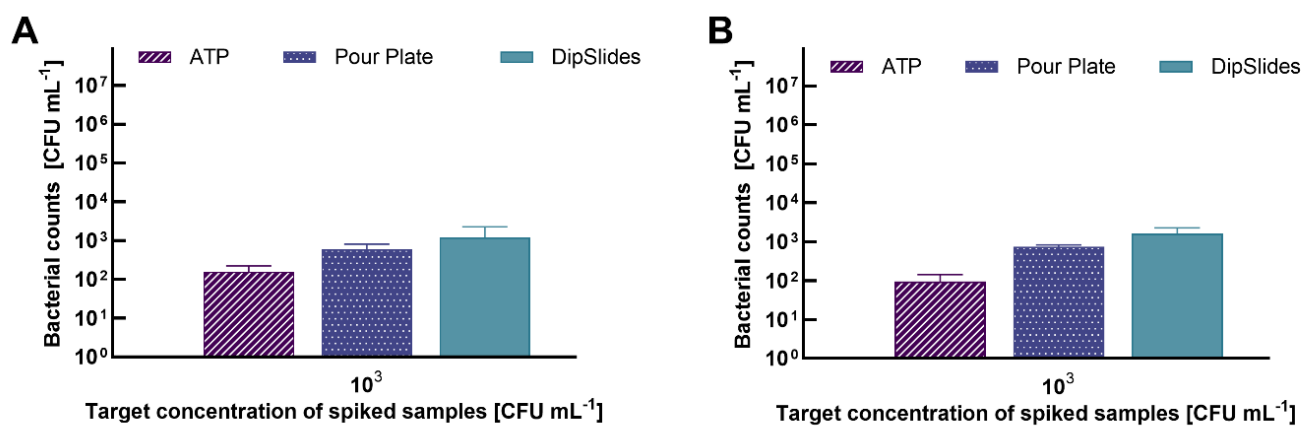

**Supplementary Figure S4.** Evaluated cell counts (CFU mL<sup>-1</sup>) using WS (A) and OW (B) as mock specimens targeting an initial cell concentration of  $10^3$  CFU mL<sup>-1</sup>. Results represent means ( $\pm$  SD),  $n = 3$ .
